# Supplementary material for: Adsorptive desulfurization by zinc-impregnated activated carbon: characterization, kinetics, isotherms, and thermodynamic modeling
Source: Springer Nature journal article supplement (doi:10.1007/s10098-015-1090-y), 2016-01-13
Supplement: MOESM1 [file 7115832]

**ADSORPTIVE DESULFURIZATION by zinc impregnated activated carbon: CHARACTERIZATION, kinetics, isotherms and thermodynamic MODELLING**

**Sandeep Kumar Thaligari, Vimal Chandra Srivastava*, Basheswar Prasad**

Department of Chemical Engineering, Indian Institute of Technology Roorkee, Roorkee – 247667, Uttarakhand, India.

*Corresponding Author: Tel.: +91-1332-285889. Fax: +91-1332-276535. E-mail: vimalcsr@yahoo.co.in (VCS), sandyouct@gmail.com (TSK), bprasad62@gmail.com (BP)

**SUPPORTING INFORMATION**

| **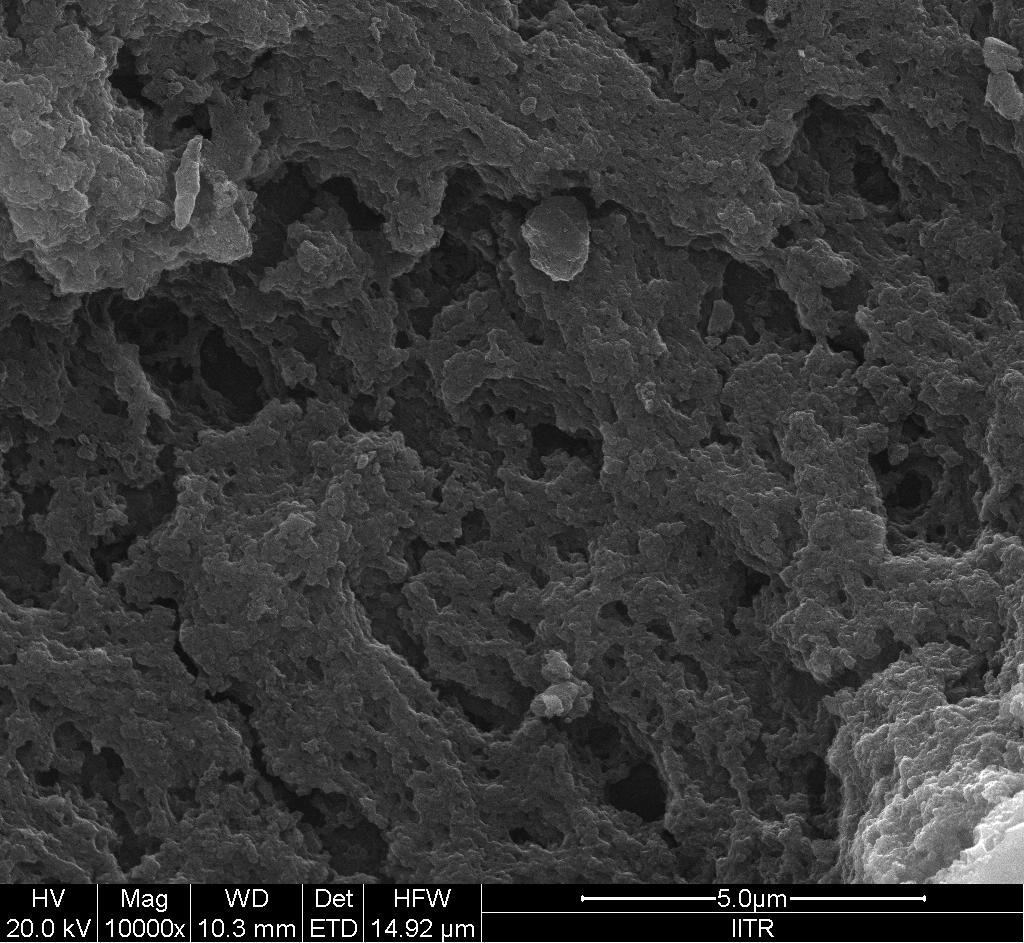** | |
| --- | --- |
| **Blank-GAC** | |
|  |  |
| **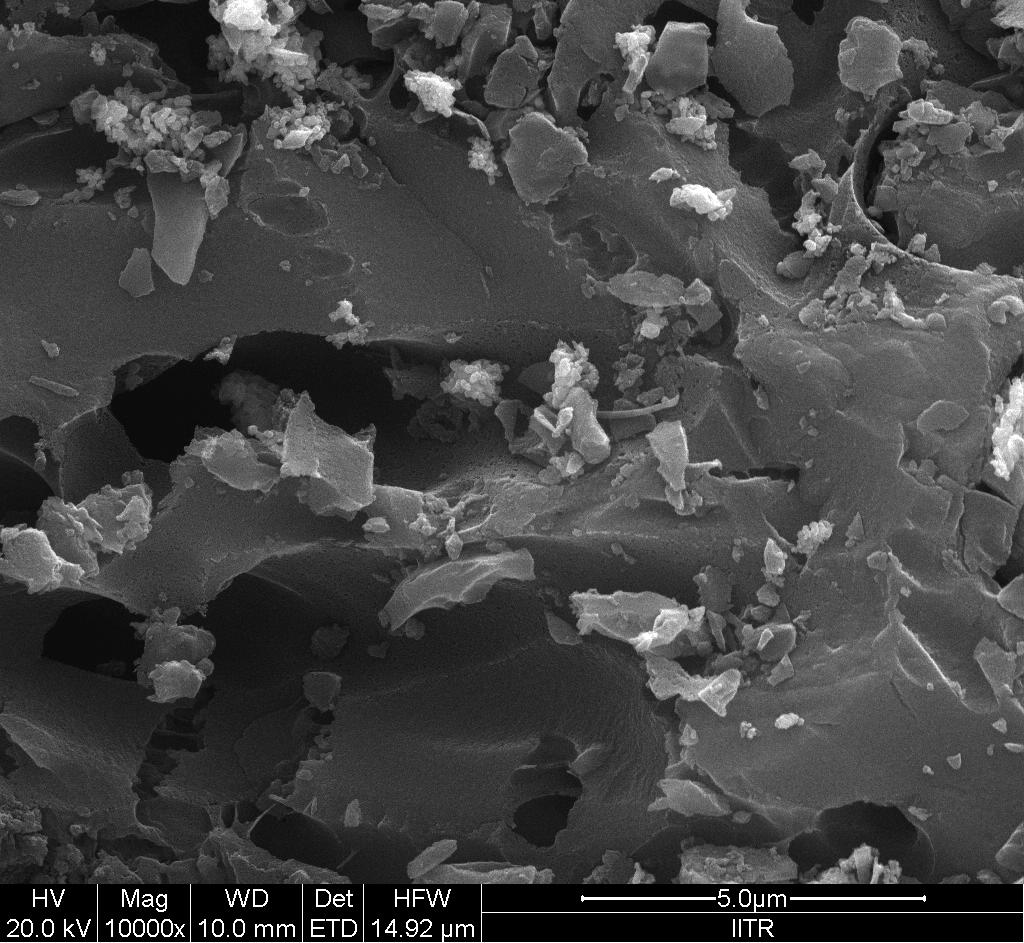** | **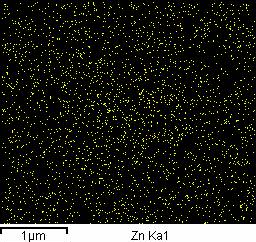** |
| **2% Zn-GAC** | **2% Zn-GAC – Zn dispersion on GAC** |

**Figure S1. Scanning electron micrograph of adsorbents.**

**Figure S2. XRD pattern of blank GAC and Zn-GAC**

**Figure S3. Thermo-gravimetric and differential thermal analysis of Zn-GAC.**

**Figure S4. Effect of adsorption dosage on sulfur removal (Co = 15.62 mmol/L, T = 303 K, t = 6 h).**


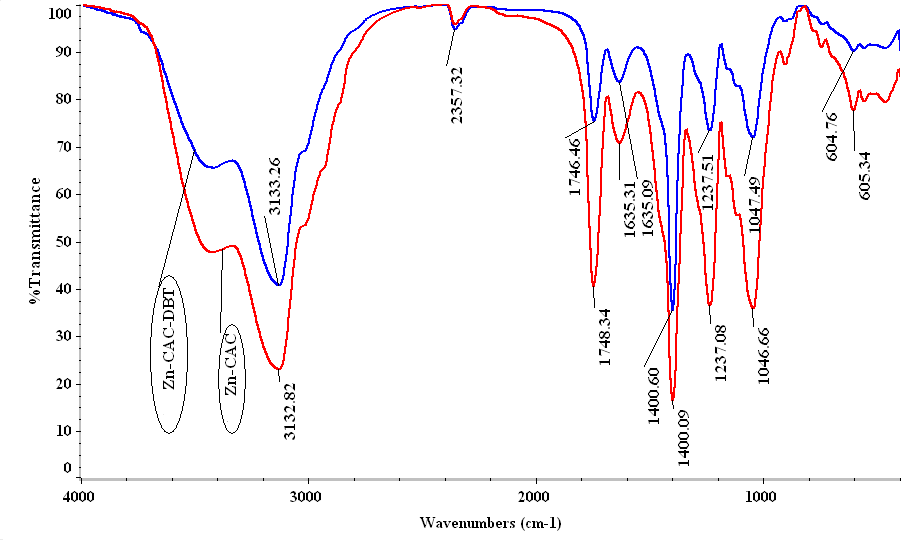


**Figure S5. FTIR spectra of Zn-GAC before and after adsorption.**
